# Supplementary material
Source: ML conference proceedings conference paper supplement (https://proceedings.mlr.press/v119/zheng20c.html)
Supplement: Supplementary file 1 [file zheng20c-supp.pdf]

---

# Error-Bounded Correction of Noisy Labels

## — Supplementary Material —

---

Songzhu Zheng<sup>1</sup> Pengxiang Wu<sup>2</sup> Aman Goswami<sup>3</sup> Mayank Goswami<sup>4</sup> Dimitris Metaxas<sup>2</sup> Chao Chen<sup>5</sup>

### 1. Additional (Synthetic) Experiment for Validation of the Bound

In Section 2.3 of the submitted manuscript, we used the output of deep neural networks  $f$  as an approximation of  $\eta$  on the CIFAR10 dataset. We provided empirical estimates of the constants  $C$  and  $\lambda$  in the Tsybakov condition for  $\eta$ , as well as estimates of the probability  $\Pr[\tilde{y} = h^*(\mathbf{x}), f_{\tilde{y}}(\mathbf{x}) < \Delta]$ .

In this section, we provide additional experiments on a *synthetic data set* generated using a mixture-of-Gaussians distribution. In this ideal setting, we know  $\eta$ ,  $\tau_{01}$ ,  $\tau_{10}$ ,  $\tilde{\eta}$  *exactly*. We can a) use  $\tilde{\eta}$  as the classifier and b) evaluate the constants in Tsybakov condition for  $\eta$  in order to evaluate the upper bound in Theorem 1.

**Estimation of Tsybakov condition constants.** We let  $\Pr(\mathbf{x})$  be a mixture of Gaussian distribution in a 10 dimensional feature space,  $\mathbf{x} \sim \frac{1}{2}\mathcal{N}(0, I_{10 \times 10}) + \frac{1}{2}\mathcal{N}(1, I_{10 \times 10})$ . We sample from the two components with equal probability. If  $\mathbf{x}$  comes from component  $\mathcal{N}(0, I_{10 \times 10})$ , it is given label 0. Otherwise, if  $\mathbf{x}$  comes from component  $\mathcal{N}(1, I_{10 \times 10})$ , it is given label 1. The true conditional distribution is  $\eta(\mathbf{x}) = \frac{\exp\{-\frac{1}{2}\|\mathbf{x}-1\|^2\}}{\exp\{-\frac{1}{2}\|\mathbf{x}\|^2\} + \exp\{-\frac{1}{2}\|\mathbf{x}-1\|^2\}}$ .

Following the idea of our experiment on CIFAR10 in the manuscript (Section 2.4), we estimate  $\Pr[|\eta(\mathbf{x}) - \frac{1}{2}| \leq t]$  for values of  $t$  sampled between 0 and 0.9 using the empirical frequency  $p_t = \frac{1}{n} \sum_{i=1}^n \mathbf{1}_{\{|\eta(\mathbf{x}_i) - 1/2| \leq t\}}$ . Note that if the Tsybakov condition is tight,  $\log(p_t)$  approximates  $\log(Ct^\lambda)$ . The samples for  $\log(p_t)$  and correspondingly,  $\log(Ct^\lambda) \approx \log(p_t)$  are drawn as blue dots in Figure 1(a). The ordinary least square (OLS) linear regression results is drawn as a red line. We found the estimated values of  $C$  and  $\lambda$  to be 0.58 and 1.27 respectively. The estimation is high is confidence: the determinant coefficient  $R^2$  equals 0.904, and we have a p-value which is less than  $10^{-4}$ .

**Estimation of the error bound, and its tightness.** We also introduce label noise using predefined transition probability  $\tau_{01}$  and  $\tau_{10}$ . We can estimate  $C$  and  $\lambda$  as mentioned above, and know  $\tau_{01}$ ,  $\tau_{10}$ ,  $\eta(\mathbf{x})$ , and thus,  $\tilde{\eta}(\mathbf{x})$ . Therefore we can evaluate the error bound in Theorem 1. We plot the error bound as a function of  $\epsilon$  in Figures 1(b) and (c) (drawn green curves).

Finally, we assume a perfect noisy classifier  $f = \tilde{\eta}$ . In other words,  $\epsilon = 0$ . We empirically show that when  $f(\mathbf{x}) < \Delta$ , the probability of  $\tilde{y}$  being correct (i.e.,  $\tilde{y} = h^*(\mathbf{x})$ ) is zero (blue lines in Figures 1(b) and (c)).

**Validation of the label-correction algorithm.** To the same synthetic dataset, we also apply our LRT-Correction algorithm and validate the bound in Corollary 1. Since we know  $\tilde{\eta}(\mathbf{x})$ ,  $\tau_{01}$  and  $\tau_{10}$ , we calculate the correction error bound of Corollary 1 in closed form. We draw the bound w.r.t. the error  $\epsilon$  in orange curves in Figure 2. Finally, we run our label correction algorithm using the perfect noisy classifier  $f = \tilde{\eta}$  and validate that the corrected labels are very close to clean (the success rate is limited by the asymmetry level of the noise pattern). See blue lines in Figure 2.

---

<sup>1</sup>Department of Applied Mathematics and Statistics, Stony Brook University, NY, USA <sup>2</sup>Department of Computer Science, Rutgers University, NJ, USA <sup>3</sup>Bain & Company, Bangalore, India. <sup>4</sup>Department of Computer Science, City University of New York, NY, USA <sup>5</sup>Department of Biomedical Informatics, Stony Brook University, NY, USA. Correspondence to: Songzhu Zheng <zheng.songzhu@stonybrook.edu>.

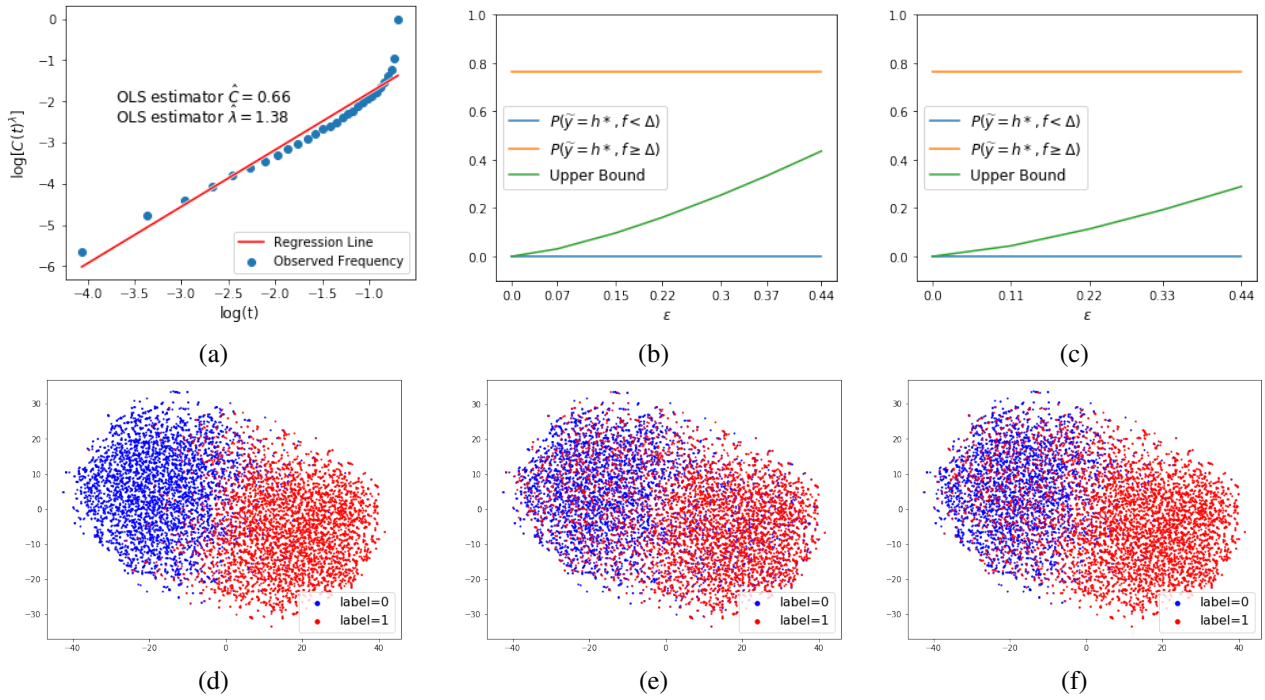

Figure 1. Synthetic experiment using Mixture of Gaussian at noise level 20%. (a): Check of Tsybakov condition using linear regression, where y-axis is the proportion of data points at distance  $t$  from decision boundary. (b): Proportion of labels that are not correct (not consistent with Bayes optimal decision rule) and the proposed upper bound. (c): Same as (b) but labels are corrupted with asymmetric noise. (d): t-SNE of the clean data. (e): t-SNE of the data with symmetric noise. (f): t-SNE of the data with asymmetric noise.

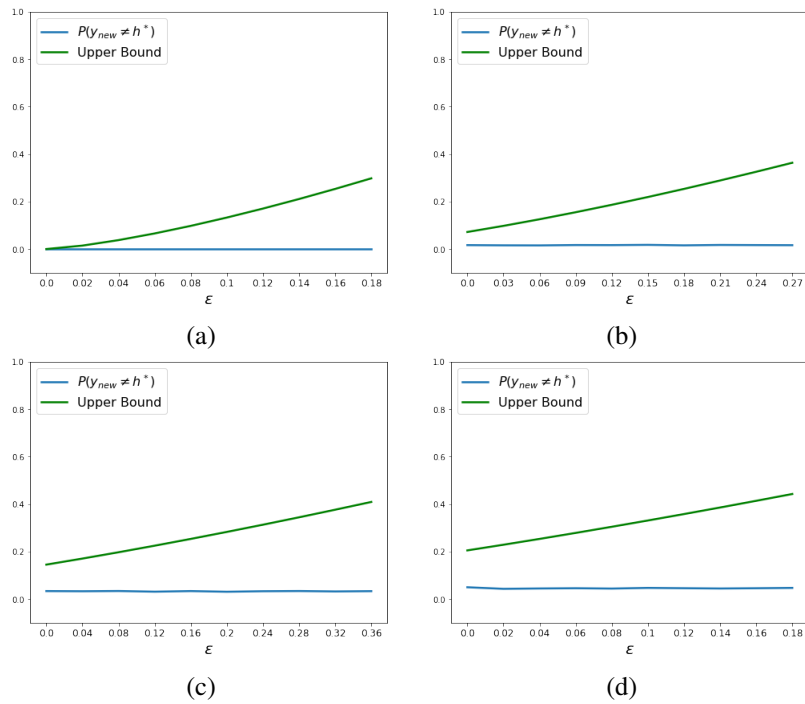

Figure 2. Performance of LRT algorithm given  $\tilde{\eta}(x)$  v.s. the proposed upper bound. (a): Symmetric noise ( $\tau_{10} = \tau_{01} = 0.3$ ). (b): Asymmetric noise ( $\tau_{10} = 0.2, \tau_{01} = 0.3$ ). (c): Asymmetric noise ( $\tau_{10} = 0.1, \tau_{01} = 0.3$ ). (d): Asymmetric noise ( $\tau_{10} = 0.3, \tau_{01} = 0$ )

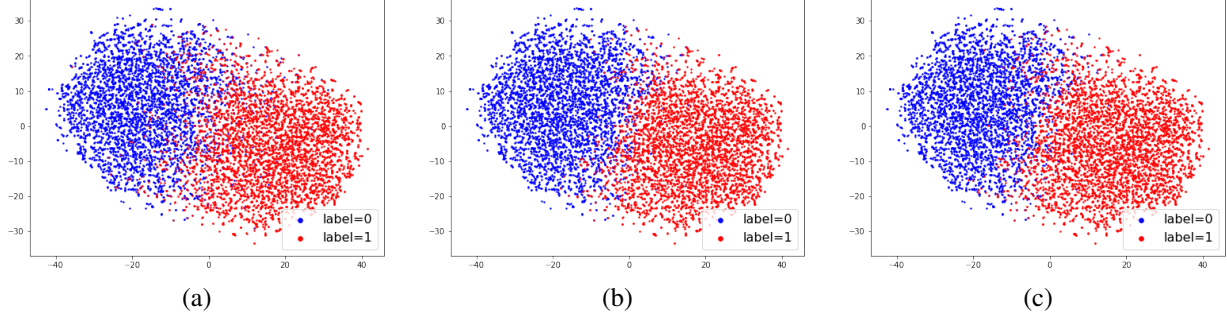

Figure 3. Label Correction Result Using LRT-Correct. (a): Clean data as it in Fig 1d. (b): Labels after correction for data in Fig 1e. (c): Labels after correction for data in Fig 1f.

## 2. Proof of Theorem 2

Define  $m_{\mathbf{x}} := \arg \max_i f_i(\mathbf{x})$ ,  $u_{\mathbf{x}} := \arg \max_i \eta_i(\mathbf{x})$  and  $s_{\mathbf{x}} := \arg \max_{i \neq u_{\mathbf{x}}} \eta_i(\mathbf{x})$ . Let  $[N_c] := \{1, 2, \dots, N_c\}$ . Finally, define  $\epsilon_i(\mathbf{x}) := |f_i(\mathbf{x}) - \tilde{\eta}_i(\mathbf{x})|$  and  $\epsilon := \max_{\mathbf{x}, i} \epsilon_i(\mathbf{x})$ .

For multi-class scenario, we know  $\forall i \in [N_c]$ ,  $\tilde{\eta}_i(\mathbf{x}) = \sum_{j \in [N_c]} \tau_{ji} \eta_j(\mathbf{x})$ . We also restate the multi-class Tsybakov condition here:

**Assumption 1** (Multi-class Tsybakov Condition).  $\exists C, \lambda > 0$  and  $t_0 \in (0, 1]$  such that for all  $t \leq t_0$ ,

$$\Pr [|\eta_{u_{\mathbf{x}}}(\mathbf{x}) - \eta_{s_{\mathbf{x}}}(\mathbf{x})| \leq t] \leq Ct^\lambda$$

**Theorem 2.** Assume  $\eta(\mathbf{x})$  fulfills multi-class Tsybakov condition for constant  $C, \lambda > 0$  and  $t_0 \in (0, 1]$ . Assume that  $\epsilon \leq t_0 \min_i \tau_{i,i}$ . For  $\Delta = \min \left[ 1, \min_{\mathbf{x}} [\tau_{\tilde{y}, \tilde{y}} \eta_{s_{\mathbf{x}}}(\mathbf{x}) + \sum_{j \neq \tilde{y}} \tau_{j, \tilde{y}} \eta_j(\mathbf{x})] \right]$ :

$$\Pr_{(x, y) \sim D} [\tilde{y} = h^*(\mathbf{x}), f_{\tilde{y}}(\mathbf{x}) < \Delta] \leq C [O(\epsilon)]^\lambda$$

*Proof.*

$$\begin{aligned} \Pr [\tilde{y} = h^*(\mathbf{x}), f_{\tilde{y}}(\mathbf{x}) < \Delta] &= \Pr [\eta_{\tilde{y}}(\mathbf{x}) \geq \eta_{s_{\mathbf{x}}}(\mathbf{x}), f_{\tilde{y}}(\mathbf{x}) < \Delta] \\ &\leq \Pr [\eta_{\tilde{y}}(\mathbf{x}) \geq \eta_{s_{\mathbf{x}}}(\mathbf{x}), \tilde{\eta}_{\tilde{y}}(\mathbf{x}) < \Delta + \epsilon_{\tilde{y}}] \\ &\leq \Pr [\eta_{\tilde{y}}(\mathbf{x}) \geq \eta_{s_{\mathbf{x}}}(\mathbf{x}), \tilde{\eta}_{\tilde{y}}(\mathbf{x}) < \Delta + \epsilon] \\ &= \Pr \left[ \eta_{\tilde{y}}(\mathbf{x}) \geq \eta_{s_{\mathbf{x}}}(\mathbf{x}), \sum_{j \in [N_c]} \tau_{j, \tilde{y}} \eta_j(\mathbf{x}) < \Delta + \epsilon \right] \\ &= \Pr \left[ \eta_{\tilde{y}}(\mathbf{x}) \geq \eta_{s_{\mathbf{x}}}(\mathbf{x}), \eta_{\tilde{y}}(\mathbf{x}) < \frac{\Delta - \sum_{j \neq \tilde{y}} \tau_{j, \tilde{y}} \eta_j(\mathbf{x}) + \epsilon}{\tau_{\tilde{y}, \tilde{y}}} \right] \\ &= \Pr \left[ \eta_{s_{\mathbf{x}}}(\mathbf{x}) \leq \eta_{\tilde{y}}(\mathbf{x}) < \frac{\Delta - \sum_{j \neq \tilde{y}} \tau_{j, \tilde{y}} \eta_j(\mathbf{x})}{\tau_{\tilde{y}, \tilde{y}}} + \frac{\epsilon}{\tau_{\tilde{y}, \tilde{y}}} \right] \end{aligned} \quad (1)$$

Remember that  $\Delta = \min \left[ 1, \min_{\mathbf{x}} [\tau_{\tilde{y}, \tilde{y}} \eta_{s_{\mathbf{x}}}(\mathbf{x}) + \sum_{j \neq \tilde{y}} \tau_{j, \tilde{y}} \eta_j(\mathbf{x})] \right] \leq \tau_{\tilde{y}, \tilde{y}} \eta_{s_{\mathbf{x}}}(\mathbf{x}) + \sum_{j \neq \tilde{y}} \tau_{j, \tilde{y}} \eta_j(\mathbf{x})$ . Then if we substitute  $\Delta$  in (1) with  $\tau_{\tilde{y}, \tilde{y}} \eta_{s_{\mathbf{x}}}(\mathbf{x}) + \sum_{j \neq \tilde{y}} \tau_{j, \tilde{y}} \eta_j(\mathbf{x})$ , continuing the derivation of (1), we will end up with:

$$\begin{aligned}
 & \Pr [\tilde{y} = h^*(\mathbf{x}), f_{\tilde{y}}(\mathbf{x}) < \Delta] \\
 & \leq \Pr \left[ \eta_{s_{\mathbf{x}}}(\mathbf{x}) \leq \eta_{\tilde{y}}(\mathbf{x}) < \frac{\Delta - \sum_{j \neq \tilde{y}} \tau_{j, \tilde{y}} \eta_j(\mathbf{x})}{\tau_{\tilde{y}, \tilde{y}}} + \frac{\epsilon}{\tau_{\tilde{y}, \tilde{y}}} \right] \\
 & \leq \Pr \left[ \eta_{s_{\mathbf{x}}}(\mathbf{x}) \leq \eta_{\tilde{y}}(\mathbf{x}) < \eta_{s_{\mathbf{x}}}(\mathbf{x}) + \frac{\epsilon}{\tau_{\tilde{y}, \tilde{y}}} \right] \leq C \left( \frac{\epsilon}{\tau_{\tilde{y}, \tilde{y}}} \right)^\lambda
 \end{aligned}$$

Notice that Tsybakov condition holds here because  $\epsilon \leq t_0 \min_i \tau_{i,i}$ , which implies that  $\frac{\epsilon}{\tau_{\tilde{y}, \tilde{y}}} \leq t_0$ . This complete the proof for this case.  $\square$

### 3. Proof of Theorem 3

**Lemma 1.** (*Algorithm Multiclass-Theorem Guarantee*). Assume  $\eta(\mathbf{x})$  fulfills multi-class Tsybakov condition for constant  $C > 0$ ,  $\lambda > 0$  and  $t_0 \in (0, 1]$ . Assume that  $\epsilon \leq t_0 \min_i \tau_{i,i}$ . Let  $\tilde{y}_{new}$  denote the output of the LRT-Correction with  $\mathbf{x}$ ,  $\tilde{y}_{\mathbf{x}}$ ,  $f$ , and the given  $\delta$ , then:

1. *Sensitivity Optimized Critical Value.* Let  $\delta = \min_{\mathbf{x}} \left[ \frac{\tau_{\tilde{y}, \tilde{y}} \eta_{s_{\mathbf{x}}}(\mathbf{x}) + \sum_{j \neq \tilde{y}} \tau_{j, \tilde{y}} \eta_j(\mathbf{x})}{f_{m_{\mathbf{x}}}(\mathbf{x})} \right]$  then :

$$\Pr_{(x,y) \sim D} [\tilde{y}_{new} \neq h^*(\mathbf{x}), \tilde{y} \text{ is rejected}] \leq C [O(\epsilon)]^\lambda + \Pr_{(x,y) \sim D} [u_{\mathbf{x}} \neq m_{\mathbf{x}}, u_{\mathbf{x}} \neq \tilde{y}]$$

2. *Specificity Optimized Critical Value.* Let  $\delta = \max_{\mathbf{x}} \left[ \frac{f_{\tilde{y}}(\mathbf{x})}{\tau_{m_{\mathbf{x}}, m_{\mathbf{x}}} \eta_{s_{\mathbf{x}}}(\mathbf{x}) + \sum_{j \neq m_{\mathbf{x}}} \tau_{j, m_{\mathbf{x}}} \eta_j(\mathbf{x})} \right]$  then :

$$\Pr_{(x,y) \sim D} [\tilde{y}_{new} \neq h^*(\mathbf{x}), \tilde{y} \text{ is accepted}] \leq C [O(\epsilon)]^\lambda + \Pr_{(x,y) \sim D} [u_{\mathbf{x}} \neq m_{\mathbf{x}}, u_{\mathbf{x}} \neq \tilde{y}]$$

*Proof.* First look at cases where  $\tilde{y}$  is rejected.

$$\begin{aligned}
 & \Pr [\tilde{y}_{new} \neq h^*(\mathbf{x}), \tilde{y} \text{ is rejected}] \\
 & = \Pr \left[ \tilde{y}_{new} \neq h^*(\mathbf{x}), \frac{f_{\tilde{y}}(\mathbf{x})}{f_{m_{\mathbf{x}}}(\mathbf{x})} < \delta \right] \\
 & = \Pr \left[ \tilde{y}_{new} = m_{\mathbf{x}} \neq h^*(\mathbf{x}) = \tilde{y}, \frac{f_{\tilde{y}}(\mathbf{x})}{f_{m_{\mathbf{x}}}(\mathbf{x})} < \delta \right] + \Pr \left[ \tilde{y}_{new} = m_{\mathbf{x}} \neq h^*(\mathbf{x}) = u_{\mathbf{x}}, u_{\mathbf{x}} \neq \tilde{y}, \frac{f_{\tilde{y}}(\mathbf{x})}{f_{m_{\mathbf{x}}}(\mathbf{x})} < \delta \right] \\
 & \leq \Pr \left[ h^*(\mathbf{x}) = \tilde{y}, \frac{f_{\tilde{y}}(\mathbf{x})}{f_{m_{\mathbf{x}}}(\mathbf{x})} < \delta \right] + \Pr \left[ \tilde{y}_{new} = m_{\mathbf{x}} \neq h^*(\mathbf{x}) = u_{\mathbf{x}}, u_{\mathbf{x}} \neq \tilde{y}, \frac{f_{\tilde{y}}(\mathbf{x})}{f_{m_{\mathbf{x}}}(\mathbf{x})} < \delta \right] \tag{2}
 \end{aligned}$$

For the first term in (2), we have:

$$\begin{aligned}
 & \Pr \left[ h^*(\mathbf{x}) = \tilde{y}, \frac{f_{\tilde{y}}(\mathbf{x})}{f_{m_{\mathbf{x}}}(\mathbf{x})} < \delta \right] = \Pr [h^*(\mathbf{x}) = \tilde{y}, f_{\tilde{y}}(\mathbf{x}) < \delta f_{m_{\mathbf{x}}}(\mathbf{x})] \\
 & \leq \Pr [\eta_{\tilde{y}}(\mathbf{x}) \geq \eta_{s_{\mathbf{x}}}(\mathbf{x}), \tilde{\eta}_{\tilde{y}}(\mathbf{x}) - \epsilon < \delta f_{m_{\mathbf{x}}}(\mathbf{x})] \\
 & \leq \Pr \left[ \eta_{s_{\mathbf{x}}}(\mathbf{x}) \leq \eta_{\tilde{y}}(\mathbf{x}) < \frac{\delta f_{m_{\mathbf{x}}}(\mathbf{x}) - \sum_{j \neq \tilde{y}} \tau_{j, \tilde{y}} \eta_j(\mathbf{x})}{\tau_{\tilde{y}, \tilde{y}}} + \frac{\epsilon}{\tau_{\tilde{y}, \tilde{y}}} \right] \tag{3}
 \end{aligned}$$

We substitute  $\delta$  in (3) with  $\frac{\tau_{\tilde{y}, \tilde{y}} \eta_{s_{\mathbf{x}}}(\mathbf{x}) + \sum_{j \neq \tilde{y}} \tau_{j, \tilde{y}} \eta_j(\mathbf{x})}{f_{m_{\mathbf{x}}}(\mathbf{x})}$  and continue the calculation:

$$\begin{aligned}
 & \Pr \left[ h^*(\mathbf{x}) = \tilde{y}, \frac{f_{\tilde{y}}(\mathbf{x})}{f_{m_{\mathbf{x}}}(\mathbf{x})} < \delta \right] \\
 & \leq \Pr \left[ \eta_{s_{\mathbf{x}}}(\mathbf{x}) \leq \eta_{\tilde{y}}(\mathbf{x}) < \frac{\delta f_{m_{\mathbf{x}}}(\mathbf{x}) - \sum_{j \neq \tilde{y}} \tau_{j, \tilde{y}} \eta_j(\mathbf{x})}{\tau_{\tilde{y}, \tilde{y}}} + \frac{\epsilon}{\tau_{\tilde{y}, \tilde{y}}} \right] \\
 & \leq \Pr \left[ \eta_{s_{\mathbf{x}}}(\mathbf{x}) \leq \eta_{\tilde{y}}(\mathbf{x}) \leq \eta_{s_{\mathbf{x}}}(\mathbf{x}) + \frac{\epsilon}{\tau_{\tilde{y}, \tilde{y}}} \right] \\
 & \leq C \left( \frac{\epsilon}{\tau_{\tilde{y}, \tilde{y}}} \right)^\lambda
 \end{aligned} \tag{4}$$

In (4), the Tsybakov condition holds here because  $\epsilon \leq t_0 \min_i \tau_{ii}$ , which implies  $\frac{\epsilon}{\tau_{\tilde{y}, \tilde{y}}} \leq t_0$ .

For the second term in (2), we have:

$$\Pr \left[ \tilde{y}_{new} = m_{\mathbf{x}} \neq h^*(\mathbf{x}) = u_{\mathbf{x}}, u_{\mathbf{x}} \neq \tilde{y}, \frac{f_{\tilde{y}}(\mathbf{x})}{f_{m_{\mathbf{x}}}(\mathbf{x})} < \delta \right] \leq \Pr [u_{\mathbf{x}} \neq m_{\mathbf{x}}, u_{\mathbf{x}} \neq \tilde{y}] \tag{5}$$

for which our algorithm currently doesn't have a good way to deal with and we will leave it as future research problem.

Finally, summarize every piece and we finished the proof for cases where  $\tilde{y}$  is rejected:

$$\begin{aligned}
 & \Pr [\tilde{y}_{new} \neq h^*(\mathbf{x}), \tilde{y} \text{ is rejected}] \leq (2) \\
 & \leq (4) + (5) \\
 & \leq C \left[ \frac{\epsilon}{\tau_{u_{\mathbf{x}}, u_{\mathbf{x}}}} \right]^\lambda + \Pr [u_{\mathbf{x}} \neq m_{\mathbf{x}}, u_{\mathbf{x}} \neq \tilde{y}] \\
 & = C [O(\epsilon)]^\lambda + \Pr [u_{\mathbf{x}} \neq m_{\mathbf{x}}, u_{\mathbf{x}} \neq \tilde{y}]
 \end{aligned}$$

For cases where  $\tilde{y}$  is accepted:

$$\begin{aligned}
 & \Pr [\tilde{y}_{new} \neq h^*(\mathbf{x}), \tilde{y} \text{ is accepted}] = \Pr \left[ \tilde{y}_{new} \neq h^*(\mathbf{x}), \frac{f_{\tilde{y}}(\mathbf{x})}{f_{m_{\mathbf{x}}}(\mathbf{x})} \geq \delta \right] \\
 & = \Pr \left[ \tilde{y}_{new} = \tilde{y} \neq h^*(\mathbf{x}) = m_{\mathbf{x}}, \frac{f_{\tilde{y}}(\mathbf{x})}{f_{m_{\mathbf{x}}}(\mathbf{x})} \geq \delta \right] + \Pr \left[ \tilde{y}_{new} = \tilde{y} \neq h^*(\mathbf{x}), m_{\mathbf{x}} \neq h^*(\mathbf{x}), \frac{f_{\tilde{y}}(\mathbf{x})}{f_{m_{\mathbf{x}}}(\mathbf{x})} \geq \delta \right] \\
 & = \Pr [\eta_{m_{\mathbf{x}}}(\mathbf{x}) \geq \eta_{s_{\mathbf{x}}}(\mathbf{x}), f_{m_{\mathbf{x}}}(\mathbf{x}) \leq f_{\tilde{y}}(\mathbf{x})/\delta] + \Pr [u_{\mathbf{x}} \neq m_{\mathbf{x}}, u_{\mathbf{x}} \neq \tilde{y}]
 \end{aligned} \tag{6}$$

For the first term in (6), we have:

$$\begin{aligned}
 & \Pr [\eta_{m_{\mathbf{x}}}(\mathbf{x}) \geq \eta_{s_{\mathbf{x}}}(\mathbf{x}), f_{m_{\mathbf{x}}}(\mathbf{x}) \leq f_{\tilde{y}}(\mathbf{x})/\delta] \leq \Pr [\eta_{m_{\mathbf{x}}}(\mathbf{x}) \geq \eta_{s_{\mathbf{x}}}(\mathbf{x}), \tilde{\eta}_{m_{\mathbf{x}}}(\mathbf{x}) - \epsilon \leq f_{\tilde{y}}(\mathbf{x})/\delta] \\
 & = \Pr \left[ \eta_{s_{\mathbf{x}}}(\mathbf{x}) \leq \eta_{m_{\mathbf{x}}}(\mathbf{x}) \leq \frac{f_{\tilde{y}}(\mathbf{x})/\delta - \sum_{j \neq m_{\mathbf{x}}} \tau_{j, m_{\mathbf{x}}} \eta_j(\mathbf{x})}{\tau_{m_{\mathbf{x}}, m_{\mathbf{x}}}} + \frac{\epsilon}{\tau_{m_{\mathbf{x}}, m_{\mathbf{x}}}} \right]
 \end{aligned} \tag{7}$$

Firstly, observe that if  $\delta > 1$ , then  $\Pr [\tilde{y}_{new} = \tilde{y} \neq h^*(\mathbf{x}), \frac{f_{\tilde{y}}(\mathbf{x})}{f_{m_{\mathbf{x}}}(\mathbf{x})} \geq \delta] = 0$  due to the definition of  $m_{\mathbf{x}}$ .

Then notice that  $\delta = \max_{\mathbf{x}} \frac{f_{\tilde{y}}(\mathbf{x})}{\tau_{m_{\mathbf{x}}, m_{\mathbf{x}}} \eta_{s_{\mathbf{x}}}(\mathbf{x}) + \sum_{j \neq m_{\mathbf{x}}} \tau_{j, m_{\mathbf{x}}} \eta_j(\mathbf{x})} \geq \frac{f_{\tilde{y}}(\mathbf{x})}{\tau_{m_{\mathbf{x}}, m_{\mathbf{x}}} \eta_{s_{\mathbf{x}}}(\mathbf{x}) + \sum_{j \neq m_{\mathbf{x}}} \tau_{j, m_{\mathbf{x}}} \eta_j(\mathbf{x})}$ . If we substitute  $\delta$  in (7) with

$\frac{f_{\tilde{y}}(\mathbf{x})}{\tau_{m_{\mathbf{x}}, m_{\mathbf{x}}} \eta_{s_{\mathbf{x}}}(\mathbf{x}) + \sum_{j \neq m_{\mathbf{x}}} \tau_{j, m_{\mathbf{x}}} \eta_j(\mathbf{x})}$  and continuing the calculation, we will have:

$$\begin{aligned}
 & \Pr [\eta_{m_{\mathbf{x}}}(\mathbf{x}) \geq \eta_{s_{\mathbf{x}}}(\mathbf{x}), f_{m_{\mathbf{x}}}(\mathbf{x}) \leq f_{\tilde{y}}(\mathbf{x})/\delta] \\
 & \leq \Pr \left[ \eta_{s_{\mathbf{x}}}(\mathbf{x}) \leq \eta_{m_{\mathbf{x}}}(\mathbf{x}) \leq \frac{f_{\tilde{y}}(\mathbf{x})/\delta - \sum_{j \neq m_{\mathbf{x}}} \tau_{j, m_{\mathbf{x}}} \eta_j(\mathbf{x})}{\tau_{m_{\mathbf{x}}, m_{\mathbf{x}}}} + \frac{\epsilon}{\tau_{m_{\mathbf{x}}, m_{\mathbf{x}}}} \right] \\
 & \leq \Pr \left[ \eta_{s_{\mathbf{x}}}(\mathbf{x}) \leq \eta_{m_{\mathbf{x}}}(\mathbf{x}) \leq \eta_{s_{\mathbf{x}}}(\mathbf{x}) + \frac{\epsilon}{\tau_{m_{\mathbf{x}}, m_{\mathbf{x}}}} \right] \\
 & \leq C \left[ \frac{\epsilon}{\tau_{m_{\mathbf{x}}, m_{\mathbf{x}}}} \right]^\lambda
 \end{aligned} \tag{8}$$

For the second term in (6), our algorithm cannot deal with it properly. We will leave it as the future research problem.

Now we summarize all pieces and we get:

$$\begin{aligned}
 & \Pr [\tilde{y}_{new} \neq h^*(\mathbf{x}), \tilde{y} \text{ is accepted}] = (6) \\
 & \leq (8) + \Pr [u_{\mathbf{x}} \neq m_{\mathbf{x}}, u_{\mathbf{x}} \neq \tilde{y}] \\
 & \leq C \left[ \frac{\epsilon}{\tau_{u_{\mathbf{x}}, u_{\mathbf{x}}}} \right]^\lambda + \Pr [u_{\mathbf{x}} \neq m_{\mathbf{x}}, u_{\mathbf{x}} \neq \tilde{y}]
 \end{aligned}$$

which complete the proof for cases that are accepted. □

We give following several facts based on our theorem:

1. For binary case, if we set  $\delta = \frac{1-|\tau_{10}-\tau_{01}|}{1+|\tau_{10}-\tau_{01}|}$  and further assume  $\epsilon \leq t_0(1 - \tau_{10} - \tau_{01}) - \frac{|\tau_{10}-\tau_{01}|}{2}$ , we have:

$$\Pr_{(\mathbf{x}, y) \sim D} [\tilde{y}_{new} \neq h^*(\mathbf{x})] \leq C \left[ \left| \frac{\tau_{10} - \tau_{01}}{2(1 - \tau_{10} - \tau_{01})} \right| + \frac{\epsilon}{1 - \tau_{10} - \tau_{01}} \right]^\lambda$$

*Proof.* For binary case, we have:

$$\begin{aligned}
 & \Pr_{(\mathbf{x}, y) \sim D} [\tilde{y}_{new} \neq h^*(\mathbf{x})] = \Pr_{(\mathbf{x}, y) \sim D} [\tilde{y}_{new} \neq h^*(\mathbf{x}), \tilde{y} \text{ is rejected}] + \Pr_{(\mathbf{x}, y) \sim D} [\tilde{y}_{new} \neq h^*(\mathbf{x}), \tilde{y} \text{ is accepted}] \\
 & = \Pr \left[ \eta_{\tilde{y}}(\mathbf{x}) > \frac{1}{2}, \frac{f_{\tilde{y}}(\mathbf{x})}{f_{m_{\mathbf{x}}}(\mathbf{x})} < \delta \right] + \Pr \left[ \eta_{\tilde{y}}(\mathbf{x}) \leq \frac{1}{2}, \frac{f_{\tilde{y}}(\mathbf{x})}{f_{m_{\mathbf{x}}}(\mathbf{x})} \geq \delta \right] \\
 & \leq \Pr \left[ \eta_{\tilde{y}}(\mathbf{x}) > \frac{1}{2}, \frac{f_{\tilde{y}}(\mathbf{x})}{1 - f_{\tilde{y}}(\mathbf{x})} < \delta \right] + \Pr \left[ \eta_{\tilde{y}}(\mathbf{x}) \leq \frac{1}{2}, \frac{f_{\tilde{y}}(\mathbf{x})}{1 - f_{\tilde{y}}(\mathbf{x})} \geq \delta \right] \\
 & \leq \Pr \left[ \eta_{\tilde{y}}(\mathbf{x}) > \frac{1}{2}, \tilde{\eta}_{\tilde{y}}(\mathbf{x}) < \frac{\delta}{1 + \delta} + \epsilon \right] + \Pr \left[ \eta_{\tilde{y}}(\mathbf{x}) \leq \frac{1}{2}, \tilde{\eta}_{\tilde{y}}(\mathbf{x}) \geq \frac{\delta}{1 + \delta} - \epsilon \right] \\
 & = \Pr \left[ \frac{1}{2} < \eta_{\tilde{y}}(\mathbf{x}) < \frac{\frac{\delta}{1 + \delta} - \tau_{1 - \tilde{y}, \tilde{y}}}{1 - \tau_{10} - \tau_{01}} + \frac{\epsilon}{1 - \tau_{10} - \tau_{01}} \right] + \Pr \left[ \frac{\frac{\delta}{1 + \delta} - \tau_{1 - \tilde{y}, \tilde{y}}}{1 - \tau_{10} - \tau_{01}} - \frac{\epsilon}{1 - \tau_{10} - \tau_{01}} \leq \eta_{\tilde{y}}(\mathbf{x}) \leq \frac{1}{2} \right] \tag{9}
 \end{aligned}$$

Observe that  $\delta = \frac{1-|\tau_{10}-\tau_{01}|}{1+|\tau_{10}-\tau_{01}|} \leq \frac{1-\tau_{\tilde{y}, 1-\tilde{y}}+\tau_{1-\tilde{y}, \tilde{y}}}{1+\tau_{\tilde{y}, 1-\tilde{y}}-\tau_{1-\tilde{y}, \tilde{y}}}$ . We also have  $\frac{\delta}{1+\delta} = \frac{1-|\tau_{10}-\tau_{01}|}{2} \leq \frac{1}{2}$ . Now we substitute  $\delta = \frac{1-\tau_{\tilde{y}, 1-\tilde{y}}+\tau_{1-\tilde{y}, \tilde{y}}}{1+\tau_{\tilde{y}, 1-\tilde{y}}-\tau_{1-\tilde{y}, \tilde{y}}}$  in the first term of (9) and substitute  $\frac{\delta}{1+\delta}$  with  $\frac{1}{2}$  in the second term of (9), by algebra we know

that :

$$\begin{aligned}
 \Pr_{(\mathbf{x}, y) \sim D} [\tilde{y}_{new} \neq h^*(\mathbf{x})] &= \Pr_{(\mathbf{x}, y) \sim D} [\tilde{y}_{new} \neq h^*(\mathbf{x}), \tilde{y} \text{ is rejected}] + \Pr_{(\mathbf{x}, y) \sim D} [\tilde{y}_{new} \neq h^*(\mathbf{x}), \tilde{y} \text{ is accepted}] \\
 &\leq \Pr \left[ \frac{1}{2} < \eta_{\tilde{y}}(\mathbf{x}) < \frac{1}{2} + \frac{\epsilon}{1 - \tau_{10} - \tau_{01}} \right] + \Pr \left[ \frac{1/2 - \max(\tau_{10}, \tau_{01})}{1 - \tau_{10} - \tau_{01}} - \frac{\epsilon}{1 - \tau_{10} - \tau_{01}} \leq \eta_{\tilde{y}}(\mathbf{x}) \leq \frac{1}{2} \right] \\
 &\leq C \left[ \left| \frac{\tau_{10} - \tau_{01}}{2(1 - \tau_{10} - \tau_{01})} \right| + \frac{\epsilon}{1 - \tau_{10} - \tau_{01}} \right]^\lambda
 \end{aligned}$$

Tsybakov assumption holds because  $\frac{\epsilon}{1 - \tau_{10} - \tau_{01}} + \frac{|\tau_{10} - \tau_{01}|}{2(1 - \tau_{10} - \tau_{01})} \leq \frac{t_0(1 - \tau_{10} - \tau_{01}) - \frac{|\tau_{10} - \tau_{01}|}{2}}{1 - \tau_{10} - \tau_{01}} + \frac{|\tau_{10} - \tau_{01}|}{2(1 - \tau_{10} - \tau_{01})} \leq t_0$ .  $\square$

2. For symmetric noise  $\tau_{ij} = \tau_{ji} = \tau, \forall i, j \in [N_c]$  and further assume (besides the assumption we made in Lemma 1)  $\epsilon \leq \frac{1}{2} \min_{\mathbf{x}} [\tilde{\eta}_{u_{\mathbf{x}}}(\mathbf{x}) - \tilde{\eta}_{s_{\mathbf{x}}}(\mathbf{x})]$ , we have:

(a) Sensitivity Optimized Critical Value. Let  $\delta = \min_{\mathbf{x}} \left[ \frac{\tau_{\tilde{y}, \tilde{y}} \eta_{s_{\mathbf{x}}}(\mathbf{x}) + \sum_{j \neq \tilde{y}} \tau_{j, \tilde{y}} \eta_j(\mathbf{x})}{f_{m_{\mathbf{x}}}(\mathbf{x})} \right]$  then :

$$\Pr_{(\mathbf{x}, y) \sim D} [\tilde{y}_{new} \neq h^*(\mathbf{x}), \tilde{y} \text{ is rejected}] \leq C [O(\epsilon)]^\lambda$$

(b) Specificity Optimized Critical Value. Let  $\delta = \max_{\mathbf{x}} \left[ \frac{f_{\tilde{y}}(\mathbf{x})}{(\tau_{m_{\mathbf{x}}, m_{\mathbf{x}}} - \tau_{\tilde{y}, m_{\mathbf{x}}}) \eta_{s_{\mathbf{x}}}(\mathbf{x}) + \tau_{\tilde{y}, m_{\mathbf{x}}}} \right]$  then :

$$\Pr_{(\mathbf{x}, y) \sim D} [\tilde{y}_{new} \neq h^*(\mathbf{x}), \tilde{y} \text{ is accepted}] \leq C [O(\epsilon)]^\lambda$$

*Proof.* Observe that under symmetric noise scenario,  $\forall i \in [N_c], \eta_{u_{\mathbf{x}}}(\mathbf{x}) \geq \eta_i(\mathbf{x})$  will implies that  $\tilde{\eta}_{u_{\mathbf{x}}}(\mathbf{x}) \geq \tilde{\eta}_i(\mathbf{x})$ , i.e.  $h^*(\mathbf{x}) = \tilde{h}^*(\mathbf{x})$ . To show this:

$$\begin{aligned}
 &\eta_{u_{\mathbf{x}}}(\mathbf{x}) \geq \eta_i(\mathbf{x}) \\
 &\iff [1 - N_c \tau] \eta_{u_{\mathbf{x}}}(\mathbf{x}) \geq [1 - N_c \tau] \eta_{u_i}(\mathbf{x}) \\
 &\iff [1 - (N_c - 1) \tau] \eta_{u_{\mathbf{x}}}(\mathbf{x}) - \tau \eta_{u_{\mathbf{x}}}(\mathbf{x}) \geq [1 - (N_c - 1) \tau] \eta_i(\mathbf{x}) - \tau \eta_i(\mathbf{x}) \\
 &\iff [1 - (N_c - 1) \tau] \eta_{u_{\mathbf{x}}}(\mathbf{x}) + \tau \eta_i(\mathbf{x}) \geq [1 - (N_c - 1) \tau] \eta_i(\mathbf{x}) + \tau \eta_{u_{\mathbf{x}}}(\mathbf{x}) \\
 &\iff [1 - (N_c - 1) \tau] \eta_{u_{\mathbf{x}}}(\mathbf{x}) + \tau \sum_{j \neq u_{\mathbf{x}}, j \neq i} \eta_j(\mathbf{x}) \geq [1 - (N_c - 1) \tau] \eta_i(\mathbf{x}) + \tau \sum_{j \neq u_{\mathbf{x}}, j \neq i} \eta_j(\mathbf{x}) \\
 &\iff [1 - (N_c - 1) \tau] \eta_{u_{\mathbf{x}}}(\mathbf{x}) + \tau \sum_{j \neq u_{\mathbf{x}}} \eta_j(\mathbf{x}) \geq [1 - (N_c - 1) \tau] \eta_i(\mathbf{x}) + \tau \sum_{j \neq i} \eta_j(\mathbf{x}) \\
 &\iff \sum_{j \in [N_c]} \tau_{j, u_{\mathbf{x}}} \eta_j(\mathbf{x}) \geq \sum_{j \in [N_c]} \tau_{j, i} \eta_j(\mathbf{x}) \\
 &\iff \tilde{\eta}_{u_{\mathbf{x}}}(\mathbf{x}) \geq \tilde{\eta}_i(\mathbf{x})
 \end{aligned}$$

Since  $\tilde{\eta}_{u_{\mathbf{x}}}(\mathbf{x}) \geq \tilde{\eta}_{s_{\mathbf{x}}}(\mathbf{x}) + 2\epsilon$ , then  $\tilde{\eta}_{u_{\mathbf{x}}}(\mathbf{x}) - \epsilon \geq \tilde{\eta}_i(\mathbf{x}) + \epsilon$  and thus  $f_{u_{\mathbf{x}}} \geq f_i(\mathbf{x}) \forall i \in [N_c]$ , which implies  $f_{m_{\mathbf{x}}}(\mathbf{x}) = f_{u_{\mathbf{x}}}(\mathbf{x})$ . As a result, second term in (2) and second term in (6) will be 0.  $\square$

**Theorem 3.** Assume  $\eta$  and  $f$  satisfy the same conditions as Lemma 1. Also assume  $\xi < \delta$  and further assume that  $\epsilon \leq \min \left( \frac{t_0 \delta^2 \min_i \tau_{ii} - \xi^2 - \xi}{\delta^2}, (t_0 - \xi) \min_i \tau_{ii} \right)$ . Let  $\tilde{y}_{new}$  be the output of the LRT-Correction with  $(\mathbf{x}, \tilde{y})$ ,  $f$ , and the approximate  $\hat{\delta}$ . Then:

1. Sensitivity Optimized Critical Value. Let  $\delta = \min_{\mathbf{x}} \left[ \frac{\tau_{\tilde{y}, \tilde{y}} \eta_{s_{\mathbf{x}}}(\mathbf{x}) + \sum_{j \neq \tilde{y}} \tau_{j, \tilde{y}} \eta_j(\mathbf{x})}{f_{m_{\mathbf{x}}}(\mathbf{x})} \right]$  then :

$$\Pr_{(\mathbf{x}, y) \sim D} [\tilde{y}_{new} \neq h^*(\mathbf{x}), \tilde{y} \text{ is rejected}] \leq C [O(\max(\epsilon, \xi))]^\lambda + \Pr [u_{\mathbf{x}} \neq m_{\mathbf{x}}, u_{\mathbf{x}} \neq \tilde{y}]$$

2. *Specificity Optimized Critical Value.* Let  $\delta = \max_{\mathbf{x}} \frac{f_{\tilde{y}}(\mathbf{x})}{\tau_{m_{\mathbf{x}}, m_{\mathbf{x}}} \eta_{s_{\mathbf{x}}}(\mathbf{x}) + \sum_{j \neq m_{\mathbf{x}}} \tau_{j, m_{\mathbf{x}}} \eta_j(\mathbf{x})}$  then :

$$\Pr_{(x,y) \sim D} [\tilde{y}_{new} \neq h^*(\mathbf{x}), \tilde{y} \text{ is accepted}] \leq C [O(\max(\epsilon, \xi))]^\lambda + \Pr [u_{\mathbf{x}} \neq m_{\mathbf{x}}, u_{\mathbf{x}} \neq \tilde{y}]$$

*Proof.* The proof will be similar to the proof of Lemma 1, but we need to adjust the error introduced by picking  $\hat{\delta}$ . Recall that  $\xi$  and  $\epsilon$  are both less than one.

If we pick  $\hat{\delta}$  instead of  $\delta$ , then for (3) in Lemma 1, we have:

$$\begin{aligned} \Pr \left[ h^*(\mathbf{x}) = \tilde{y}, \frac{f_{\tilde{y}}(\mathbf{x})}{f_{m_{\mathbf{x}}}(\mathbf{x})} < \hat{\delta} \right] &= \Pr \left[ h^*(\mathbf{x}) = \tilde{y}, f_{\tilde{y}}(\mathbf{x}) < \hat{\delta} f_{m_{\mathbf{x}}}(\mathbf{x}) \right] \\ &\leq \Pr \left[ \eta_{\tilde{y}}(\mathbf{x}) \geq \eta_{s_{\mathbf{x}}}(\mathbf{x}), \tilde{\eta}_{\tilde{y}}(\mathbf{x}) - \epsilon < \hat{\delta} f_{m_{\mathbf{x}}}(\mathbf{x}) \right] \\ &\leq \Pr \left[ \eta_{s_{\mathbf{x}}}(\mathbf{x}) \leq \eta_{\tilde{y}}(\mathbf{x}) < \frac{\hat{\delta} f_{m_{\mathbf{x}}}(\mathbf{x}) - \sum_{j \neq \tilde{y}} \tau_{j, \tilde{y}} \eta_j(\mathbf{x})}{\tau_{\tilde{y}, \tilde{y}}} + \frac{\epsilon}{\tau_{\tilde{y}, \tilde{y}}} \right] \\ &\leq \Pr \left[ \eta_{s_{\mathbf{x}}}(\mathbf{x}) \leq \eta_{\tilde{y}}(\mathbf{x}) < \frac{(\delta + \xi) f_{m_{\mathbf{x}}}(\mathbf{x}) - \sum_{j \neq \tilde{y}} \tau_{j, \tilde{y}} \eta_j(\mathbf{x})}{\tau_{\tilde{y}, \tilde{y}}} + \frac{\epsilon}{\tau_{\tilde{y}, \tilde{y}}} \right] \\ &\leq \Pr \left[ \eta_{s_{\mathbf{x}}}(\mathbf{x}) \leq \eta_{\tilde{y}}(\mathbf{x}) < \frac{\delta f_{m_{\mathbf{x}}}(\mathbf{x}) - \sum_{j \neq \tilde{y}} \tau_{j, \tilde{y}} \eta_j(\mathbf{x})}{\tau_{\tilde{y}, \tilde{y}}} + \frac{\epsilon + \xi}{\tau_{\tilde{y}, \tilde{y}}} \right] \\ &\leq C \left[ \frac{\epsilon + \xi}{\tau_{\tilde{y}, \tilde{y}}} \right]^\lambda \end{aligned} \tag{10}$$

The same upper bound holds for (5) with the same reason. Then:

$$\begin{aligned} \Pr [\tilde{y}_{new} \neq h^*(\mathbf{x}), \tilde{y} \text{ is rejected}] &\leq (10) + \Pr [u_{\mathbf{x}} \neq m_{\mathbf{x}}, u_{\mathbf{x}} \neq \tilde{y}] \\ &= C [O(\max(\epsilon, \xi))]^\lambda + \Pr [u_{\mathbf{x}} \neq m_{\mathbf{x}}, u_{\mathbf{x}} \neq \tilde{y}] \end{aligned}$$

We next analyze (7) in Lemma 1:

$$\begin{aligned} \Pr \left[ \eta_{m_{\mathbf{x}}}(\mathbf{x}) \geq \eta_{s_{\mathbf{x}}}(\mathbf{x}), f_{m_{\mathbf{x}}}(\mathbf{x}) \leq f_{\tilde{y}}(\mathbf{x})/\hat{\delta} \right] &\leq \Pr \left[ \eta_{m_{\mathbf{x}}}(\mathbf{x}) \geq \eta_{s_{\mathbf{x}}}(\mathbf{x}), \tilde{\eta}_{m_{\mathbf{x}}}(\mathbf{x}) - \epsilon \leq f_{\tilde{y}}(\mathbf{x})/\hat{\delta} \right] \\ &= \Pr \left[ \eta_{s_{\mathbf{x}}}(\mathbf{x}) \leq \eta_{m_{\mathbf{x}}}(\mathbf{x}) \leq \frac{f_{\tilde{y}}(\mathbf{x})/\hat{\delta} - \sum_{j \neq m_{\mathbf{x}}} \tau_{j, m_{\mathbf{x}}} \eta_j(\mathbf{x})}{\tau_{m_{\mathbf{x}}, m_{\mathbf{x}}}} + \frac{\epsilon}{\tau_{m_{\mathbf{x}}, m_{\mathbf{x}}}} \right] \\ &\leq \Pr \left[ \eta_{s_{\mathbf{x}}}(\mathbf{x}) \leq \eta_{m_{\mathbf{x}}}(\mathbf{x}) \leq \frac{f_{\tilde{y}}(\mathbf{x})/(\delta - \xi) - \sum_{j \neq m_{\mathbf{x}}} \tau_{j, m_{\mathbf{x}}} \eta_j(\mathbf{x})}{\tau_{m_{\mathbf{x}}, m_{\mathbf{x}}}} + \frac{\epsilon}{\tau_{m_{\mathbf{x}}, m_{\mathbf{x}}}} \right] \\ &= \Pr \left[ 0 < \eta_{m_{\mathbf{x}}}(\mathbf{x}) - \eta_{s_{\mathbf{x}}}(\mathbf{x}) < \frac{f_{\tilde{y}}(\mathbf{x})/\delta - \sum_{j \neq m_{\mathbf{x}}} \tau_{j, m_{\mathbf{x}}} \eta_j(\mathbf{x})}{\tau_{m_{\mathbf{x}}, m_{\mathbf{x}}}} - \eta_{s_{\mathbf{x}}}(\mathbf{x}) + \frac{\epsilon}{\tau_{m_{\mathbf{x}}, m_{\mathbf{x}}}} + \frac{\xi f_{\tilde{y}}(\mathbf{x})}{\delta(\delta - \xi)} \right] \end{aligned}$$

Observe that  $\frac{\xi}{\delta(\delta - \xi)} = \frac{\delta}{(\delta - \xi)} \frac{\xi}{\delta^2} = [1 + O(\xi)] \frac{\xi}{\delta^2}$ , where second equality comes from Taylor expansion. Then we substitute the  $\delta$  as what we did in Lemma 1 and continue the calculation:



$$\begin{aligned}
 & \Pr \left[ \eta_{m_{\mathbf{x}}}(\mathbf{x}) \geq \eta_{s_{\mathbf{x}}}(\mathbf{x}), f_{m_{\mathbf{x}}}(\mathbf{x}) \leq f_{\tilde{y}}(\mathbf{x})/\hat{\delta} \right] \\
 & \leq \Pr \left[ 0 < \eta_{m_{\mathbf{x}}}(\mathbf{x}) - \eta_{s_{\mathbf{x}}}(\mathbf{x}) < \frac{f_{\tilde{y}}(\mathbf{x})/\delta - \sum_{j \neq m_{\mathbf{x}}} \tau_{j, m_{\mathbf{x}}} \eta_j(\mathbf{x})}{\tau_{m_{\mathbf{x}}, m_{\mathbf{x}}}} - \eta_{s_{\mathbf{x}}}(\mathbf{x}) + \frac{\epsilon}{\tau_{m_{\mathbf{x}}, m_{\mathbf{x}}}} + \frac{\frac{\xi f_{\tilde{y}}(\mathbf{x})}{\delta(\delta - \xi)}}{\tau_{m_{\mathbf{x}}, m_{\mathbf{x}}}} \right] \\
 & \leq \Pr \left[ 0 \leq \eta_{m_{\mathbf{x}}}(\mathbf{x}) - \eta_{s_{\mathbf{x}}}(\mathbf{x}) \leq \frac{\epsilon}{\tau_{m_{\mathbf{x}}, m_{\mathbf{x}}}} + \frac{\xi f_{\tilde{y}}(\mathbf{x})}{\delta^2 \tau_{m_{\mathbf{x}}, m_{\mathbf{x}}}} + \frac{\xi O(\xi) f_{\tilde{y}}(\mathbf{x})}{\delta^2 \tau_{m_{\mathbf{x}}, m_{\mathbf{x}}}} \right] \\
 & \leq \Pr \left[ 0 \leq \eta_{m_{\mathbf{x}}}(\mathbf{x}) - \eta_{s_{\mathbf{x}}}(\mathbf{x}) \leq \frac{\epsilon}{\tau_{m_{\mathbf{x}}, m_{\mathbf{x}}}} + \frac{\xi}{\delta^2 \tau_{m_{\mathbf{x}}, m_{\mathbf{x}}}} + \frac{\xi^2}{\delta^2 \tau_{m_{\mathbf{x}}, m_{\mathbf{x}}}} \right] \\
 & \leq C \left[ \frac{\epsilon}{\tau_{m_{\mathbf{x}}, m_{\mathbf{x}}}} + \frac{\xi}{\delta^2 \tau_{m_{\mathbf{x}}, m_{\mathbf{x}}}} + \frac{\xi^2}{\delta^2 \tau_{m_{\mathbf{x}}, m_{\mathbf{x}}}} \right]^\lambda \tag{11}
 \end{aligned}$$

Here Tsybakove condition hold, because  $\frac{\epsilon}{\tau_{m_{\mathbf{x}}, m_{\mathbf{x}}}} + \frac{\xi}{\delta^2 \tau_{m_{\mathbf{x}}, m_{\mathbf{x}}}} + \frac{\xi^2}{\delta^2 \tau_{m_{\mathbf{x}}, m_{\mathbf{x}}}} \leq \frac{t_0 \delta^2 \min_i \tau_{ii} - \xi^2 - \xi}{\delta^2 \tau_{m_{\mathbf{x}}, m_{\mathbf{x}}}} + \frac{\xi}{\delta^2 \tau_{m_{\mathbf{x}}, m_{\mathbf{x}}}} + \frac{\xi^2}{\delta^2 \tau_{m_{\mathbf{x}}, m_{\mathbf{x}}}} \leq t_0$ .  
 As a result:

$$\begin{aligned}
 & \Pr [\tilde{y}_{new} \neq h^*(\mathbf{x}), \tilde{y} \text{ is accepted}] \\
 & \leq (11) + \Pr [u_{\mathbf{x}} \neq m_{\mathbf{x}}, u_{\mathbf{x}} \neq \tilde{y}] \\
 & \leq C [O(\max(\epsilon, \xi))]^\lambda + \Pr [u_{\mathbf{x}} \neq m_{\mathbf{x}}, u_{\mathbf{x}} \neq \tilde{y}]
 \end{aligned}$$

which complete the proof for cases that are accepted.

Other terms will not be affected by the choice of  $\delta$ . By now we completes the proof.  $\square$
